# Supplementary material for: Molecular evolution of UCP1 and the evolutionary history of mammalian non-shivering thermogenesis
Source: PubMed Central journal article supplement (PMC2627829; doi:10.1186/1471-2148-9-4), 2009-01-07
Supplement: 1471-2148-9-4-S1.pdf [file 1471-2148-9-4-S1.pdf]

| Species                          | Abbreviation | Common Name              | UCP1               | UCP2               | UCP3               |
|----------------------------------|--------------|--------------------------|--------------------|--------------------|--------------------|
| <i>Antechnius flavipes</i>       | Afl          | yellow-footed Antechnius |                    | AY233003           | AY519198.1         |
| <i>Bos torus</i>                 | Bta          | cow                      | XM_616977          | XM_614452          | NM_174210          |
| <i>Canis familiaris</i>          | Cfa          | dog                      | NM_001003046       | NM_001003048       | NM_001003047       |
| <i>Ctenopharyngodon idella</i>   | Cid          |                          |                    | AY948546           |                    |
| <i>Cyprinus carpio</i>           | Cca          | common carp              | AY461434           | AJ243486           |                    |
| <i>Danio rerio</i>               | Dre          | zebrafish                | NM_199523          | ENSDART00000063359 | Klingenspor Lab    |
| <i>Dicrostonyx groenlandicus</i> | Dgr          | lemming                  | AF515781           | AY484518           |                    |
| <i>Echinops telfairi</i>         | Ete          | tenrec                   | ENSETET00000010923 |                    |                    |
| <i>Equus caballus</i>            | Eca          | horse                    |                    | NW_001799731       |                    |
| <i>Erinaceus europaeus</i>       | Eeu          | hedgehog                 | ENSEEUG00000005182 | ENSEEUG00000007994 |                    |
| <i>Eupetomena macroura</i>       | Ema          | hummingbird              |                    |                    | AF255729           |
| <i>Felix catus</i>               | Fca          | cat                      |                    | ENSFCAG00000005031 | ENSFCAG00000005033 |
| <i>Gasterosteus aculeatus</i>    | Gac          | stickleback              |                    | ENSGACT00000026955 | BT027074           |
| <i>Gallus gallus</i>             | Gga          | Chicken                  |                    |                    | ENSGALT00000027985 |
| <i>Homo sapiens</i>              | Hsa          | human                    | NM_021833          | NM_003355          | NM_003356          |
| <i>Leuciscus cephalus</i>        | Lce          | European chub            |                    | AY368268           |                    |
| <i>Macaca mulatta</i>            | Mamul        | Rhesus macaque           | XM_001090457       | ENSMMUG00000002605 | ENSMMUG00000010317 |
| <i>Mesocricetus auratus</i>      | Mau          | golden hamster           | X73138             |                    |                    |
| <i>Microcebus murinus</i>        | Mmur         | gray mouse lemer         |                    | ENSMICT00000012697 | ENSMICT00000012706 |
| <i>Monodelphis domestica</i>     | Mdo          | opossum                  | ENSMODT00000000201 | ENSMODT00000009488 | ENSMODT00000009440 |
| <i>Mus musculus</i>              | Mmu          | mouse                    | NM_009463          | NM_011671          | AF032902           |
| <i>Myotis lucifugus</i>          | Mlu          | brown bat                | ENSMLUT00000009572 | ENSMLUT00000012109 | ENSMLUT00000012118 |

|                                  |     |                     |                    |                     |                    |
|----------------------------------|-----|---------------------|--------------------|---------------------|--------------------|
| <i>Ochotona princeps</i>         | Opr | pika                |                    | ENSOPRT00000010420  |                    |
| <i>Ochotona dauurica</i>         | Oda | Daurian Pika        | AB283043           |                     |                    |
| <i>Oncorhynchus mykiss</i>       | Omy |                     |                    | DQ295326 / DQ295328 |                    |
| <i>Ornithorhynchus anatinus</i>  | Oan | platypus            | ENSOANT00000024080 | ENSOANT00000011476  | ENSOANT00000012331 |
| <i>Oryctolagus cuniculus</i>     | Ocu | rabbit              | X14696             |                     |                    |
| <i>Otolemur garnettii</i>        | Oga | bushbabby           | ENSOGAT00000006809 | ENSOGAT00000001699  | ENSOGAT00000002909 |
| <i>Pan troglodytes</i>           | Ptr | chimpanzee          | ENSPTRT00000030601 | ENSPTRT00000007559  | ENSPTRT00000007562 |
| <i>Phodopus sungorus</i>         | Psu | Djungarian hamster  | AF271263           | AF271264            | AF271265           |
| <i>Rattus norvegicus</i>         | Rno | rat                 | NM_012682          | NM_019354           | NM_013167          |
| <i>Sminthopsis crassicaudata</i> | Scr | Fat Tailed Dunnart  | EF622232           |                     |                    |
| <i>Suncus murinus</i>            | Smu | Asian house shrew   | AB244816           |                     |                    |
| <i>Sus scrofa</i>                | Scs | pig                 |                    | NM_214289           | NM_214049          |
| <i>Tetraodon nigroviridis</i>    | Tni | pufferfish          | CR640550           | Klingenspor Lab     | Klingenspor Lab    |
| <i>Takifugu rubripes</i>         | Tru | pufferfish          | SINFRUT00000155540 |                     | Klingenspor Lab    |
| <i>Tupaia belangeri</i>          | Tbe | tree shrew          | ENSTBET00000000042 | ENSTBET00000001469  |                    |
| <i>Zoarces viviparus</i>         | Zvi | viviparous blenny   |                    | AY625191            |                    |
| <i>Xenopus tropicalis</i>        | Xtr | western clawed frog | ENSXETT00000032640 | ENSXETT00000055772  | Klingenspor Lab    |
